# Supplementary material for: Structural basis of RNA processing by human mitochondrial RNase P
Source: Nat Struct Mol Biol. 2021 Sep 6;28(9):713–23. doi: 10.1038/s41594-021-00637-y (PMC8437803; doi:10.1038/s41594-021-00637-y)

---

**Supplementary information**

---

**Structural basis of RNA processing by  
human mitochondrial RNase P**

---

In the format provided by the  
authors and unedited

# Supplementary Note 1

Table listing nucleotide positions in mitochondrial tRNA<sup>Tyr</sup> (tRNA numbering used in the deposited structural model) and corresponding canonical tRNA nucleotide positions (tRNA numbering used in the manuscript)

| tRNA <sup>Tyr</sup> | Canonical | Base | Region         |
|---------------------|-----------|------|----------------|
| 1                   | 1         | G    | Acceptor Stem  |
| 2                   | 2         | G    |                |
| 3                   | 3         | U    |                |
| 4                   | 4         | A    |                |
| 5                   | 5         | A    |                |
| 6                   | 6         | A    |                |
| 7                   | 7         | A    |                |
| 8                   | 8         | U    |                |
| 9                   | 9         | G    |                |
| 10                  | 10        | G    | D Stem         |
| 11                  | 11        | C    |                |
| 12                  | 12        | U    |                |
| 13                  | 13        | G    |                |
| 14                  | 14        | A    | D Loop         |
| 15                  | 16        | G    |                |
| 16                  | 18        | U    |                |
| 17                  | 20        | G    |                |
| 18                  | 22        | A    | D Stem         |
| 19                  | 23        | A    |                |
| 20                  | 24        | G    |                |
| 21                  | 25        | C    |                |
| 22                  | 26        | A    |                |
| 23                  | 27        | U    | Anticodon Stem |
| 24                  | 28        | U    |                |
| 25                  | 29        | G    |                |
| 26                  | 30        | G    |                |
| 27                  | 31        | A    |                |
| 28                  | 32        | C    | Anticodon Loop |
| 29                  | 33        | U    |                |
| 30                  | 34        | G    |                |
| 31                  | 35        | U    |                |
| 32                  | 36        | A    |                |
| 33                  | 37        | A    |                |
| 34                  | 38        | A    |                |

| tRNA <sup>Tyr</sup> | Canonical | Base | Region             |
|---------------------|-----------|------|--------------------|
| 35                  | 39        | U    | Anticodon Stem     |
| 36                  | 40        | C    |                    |
| 37                  | 41        | U    |                    |
| 38                  | 42        | A    |                    |
| 39                  | 43        | A    |                    |
| 40                  | 44        | A    | Variable Region    |
| 41                  | 45        | G    |                    |
| 42                  | 47        | A    |                    |
| 43                  | 48        | C    |                    |
| 44                  | 49        | A    | T Stem             |
| 45                  | 50        | G    |                    |
| 46                  | 51        | G    |                    |
| 47                  | 52        | G    |                    |
| 48                  | 53        | G    |                    |
| 49                  | 54        | U    | T Loop             |
| 50                  | 55        | U    |                    |
| 51                  | 57        | A    |                    |
| 52                  | 59        | G    |                    |
| 53                  | 60        | G    |                    |
| 54                  | 61        | C    | T Stem             |
| 55                  | 62        | C    |                    |
| 56                  | 63        | U    |                    |
| 57                  | 64        | C    |                    |
| 58                  | 65        | U    |                    |
| 59                  | 66        | U    | Acceptor Stem      |
| 60                  | 67        | U    |                    |
| 61                  | 68        | U    |                    |
| 62                  | 69        | U    |                    |
| 63                  | 70        | A    |                    |
| 64                  | 71        | C    |                    |
| 65                  | 72        | C    |                    |
| 66                  | 73        | A    | Discriminator Base |

# Supplementary Note 2

## Sequence alignment of N-terminal region of TRMT10C orthologues

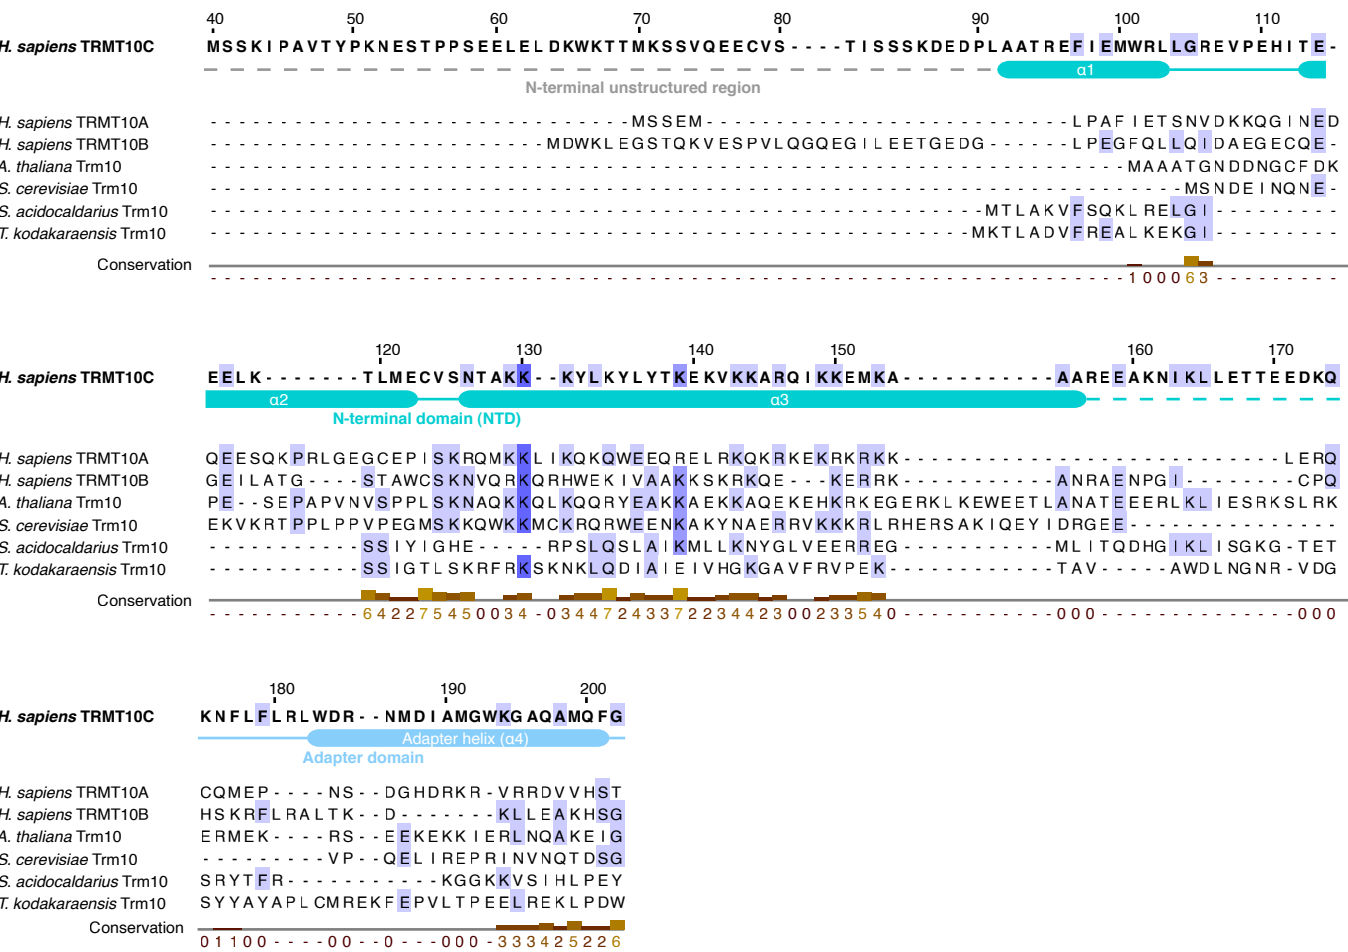

# Supplementary Note 3

## Sequence alignment of PPR domains of PRORP orthologues

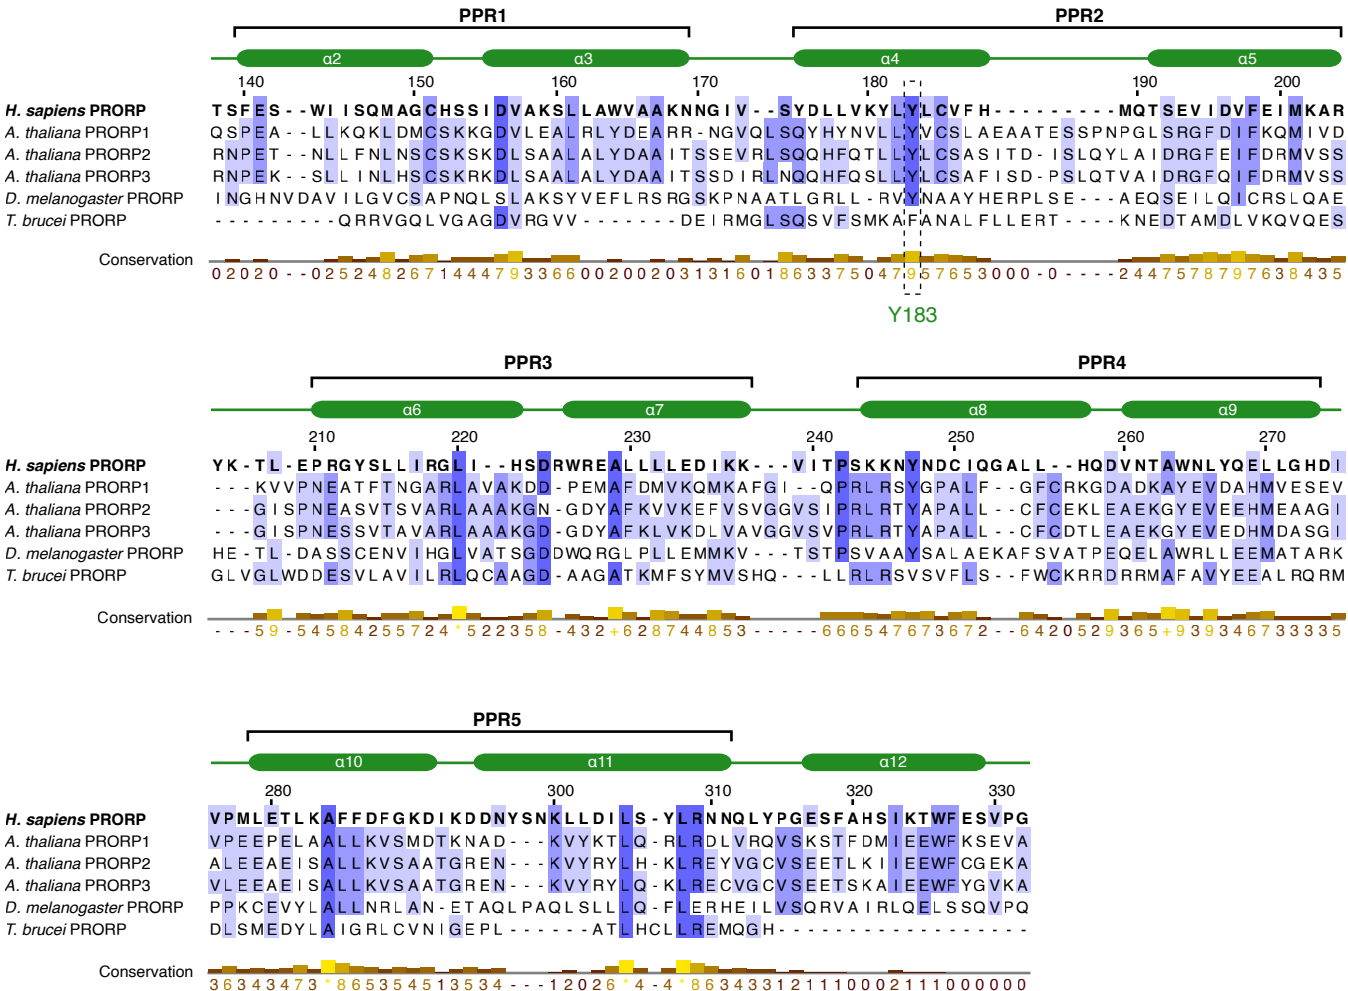

Supplement: Supplementary file 1 — Supplementary Notes 1–3. [file 41594_2021_637_MOESM1_ESM.pdf]
