# Supplementary material for: Structural basis of RNA processing by human mitochondrial RNase P
Source: Nat Struct Mol Biol. 2021 Sep 6;28(9):713–23. doi: 10.1038/s41594-021-00637-y (PMC8437803; doi:10.1038/s41594-021-00637-y)
Supplement: Source Data Extended Data Fig. 1 — Raw data for chromatogram for mtRNase P complex purification in panel d. [file 41594_2021_637_MOESM6_ESM.xls]

## Sheet: Sheet1
Source Data for Extended Data Figure 1d
Size Exclusion Chromatography Chromatogram
Retention Volume	Absorbance at 280 nm
ml	mAU
0	0.497
0.00265863	-0.127
0.00531726	-0.159
0.00797589	-0.191
0.0106345	-0.223
0.0132931	-0.253
0.0159518	-0.284
0.0186104	-0.314
0.021269	-0.352
0.0239277	-0.401
0.0265863	-0.451
0.0292449	-0.5
0.0319035	-0.537
0.0345622	-0.569
0.0372208	-0.601
0.0398794	-0.633
0.0425381	-0.675
0.0451967	-0.718
0.0478553	-0.761
0.050514	-0.804
0.0531726	-0.846
0.0558312	-0.888
0.0584898	-0.93
0.0611485	-0.97
0.0638071	-1.005
0.0664657	-1.04
0.0691244	-1.076
0.071783	-1.109
0.0744416	-1.142
0.0771002	-1.174
0.0797589	-1.207
0.0824175	-1.24
0.0850761	-1.274
0.0877348	-1.308
0.0903934	-1.342
0.093052	-1.385
0.0957106	-1.428
0.0983693	-1.471
0.101028	-1.513
0.103687	-1.555
0.106345	-1.596
0.109004	-1.638
0.111662	-1.676
0.114321	-1.711
0.11698	-1.747
0.119638	-1.783
0.122297	-1.819
0.124956	-1.856
0.127614	-1.892
0.130273	-1.928
0.132931	-1.954
0.13559	-1.98
0.138249	-2.005
0.140907	-2.032
0.143566	-2.061
0.146225	-2.091
0.148883	-2.12
0.151542	-2.141
0.1542	-2.153
0.156859	-2.165
0.159518	-2.177
0.162176	-2.202
0.164835	-2.23
0.167494	-2.257
0.170152	-2.285
0.172811	-2.304
0.17547	-2.323
0.178128	-2.342
0.180787	-2.361
0.183445	-2.382
0.186104	-2.402
0.188763	-2.423
0.191421	-2.441
0.19408	-2.457
0.196739	-2.473
0.199397	-2.49
0.202056	-2.503
0.204714	-2.515
0.207373	-2.527
0.210032	-2.54
0.21269	-2.545
0.215349	-2.551
0.218008	-2.557
0.220666	-2.56
0.223325	-2.555
0.225983	-2.55
0.228642	-2.546
0.231301	-2.54
0.233959	-2.534
0.236618	-2.528
0.239277	-2.522
0.241935	-2.514
0.244594	-2.506
0.247252	-2.497
0.249911	-2.489
0.25257	-2.482
0.255228	-2.475
0.257887	-2.469
0.260546	-2.461
0.263204	-2.445
0.265863	-2.43
0.268522	-2.414
0.27118	-2.402
0.273839	-2.393
0.276497	-2.385
0.279156	-2.376
0.281815	-2.366
0.284473	-2.355
0.287132	-2.344
0.289791	-2.333
0.292449	-2.315
0.295108	-2.295
0.297766	-2.275
0.300425	-2.257
0.303084	-2.261
0.305742	-2.265
0.308401	-2.269
0.31106	-2.274
0.313718	-2.282
0.316377	-2.29
0.319035	-2.299
0.321694	-2.316
0.324353	-2.339
0.327011	-2.363
0.32967	-2.386
0.332329	-2.423
0.334987	-2.464
0.337646	-2.504
0.340305	-2.544
0.342963	-2.585
0.345622	-2.625
0.34828	-2.666
0.350939	-2.706
0.353598	-2.743
0.356256	-2.781
0.358915	-2.819
0.361574	-2.856
0.364232	-2.892
0.366891	-2.927
0.369549	-2.963
0.372208	-3.008
0.374867	-3.055
0.377525	-3.102
0.380184	-3.149
0.382843	-3.186
0.385501	-3.224
0.38816	-3.261
0.390818	-3.298
0.393477	-3.331
0.396136	-3.365
0.398794	-3.398
0.401453	-3.42
0.404112	-3.431
0.40677	-3.442
0.409429	-3.452
0.412087	-3.428
0.414746	-3.392
0.417405	-3.356
0.420063	-3.32
0.422722	-3.214
0.425381	-3.106
0.428039	-2.998
0.430698	-2.878
0.433357	-2.714
0.436015	-2.55
0.438674	-2.385
0.441332	-2.25
0.443991	-2.15
0.44665	-2.049
0.449308	-1.949
0.451967	-1.941
0.454626	-1.973
0.457284	-2.006
0.459943	-2.039
0.462601	-2.111
0.46526	-2.186
0.467919	-2.261
0.470577	-2.333
0.473236	-2.389
0.475895	-2.445
0.478553	-2.501
0.481212	-2.559
0.48387	-2.618
0.486529	-2.678
0.489188	-2.737
0.491846	-2.795
0.494505	-2.852
0.497164	-2.909
0.499822	-2.967
0.502481	-3.029
0.50514	-3.093
0.507798	-3.157
0.510457	-3.219
0.513115	-3.271
0.515774	-3.323
0.518433	-3.375
0.521091	-3.427
0.52375	-3.478
0.526409	-3.529
0.529067	-3.581
0.531726	-3.631
0.534384	-3.681
0.537043	-3.731
0.539702	-3.781
0.54236	-3.82
0.545019	-3.857
0.547678	-3.893
0.550336	-3.931
0.552995	-3.977
0.555653	-4.023
0.558312	-4.07
0.560971	-4.111
0.563629	-4.141
0.566288	-4.171
0.568947	-4.201
0.571605	-4.231
0.574264	-4.26
0.576922	-4.29
0.579581	-4.32
0.58224	-4.357
0.584898	-4.396
0.587557	-4.435
0.590216	-4.474
0.592874	-4.521
0.595533	-4.569
0.598192	-4.617
0.60085	-4.665
0.603509	-4.716
0.606167	-4.767
0.608826	-4.817
0.611485	-4.867
0.614143	-4.915
0.616802	-4.963
0.619461	-5.011
0.622119	-5.067
0.624778	-5.126
0.627436	-5.185
0.630095	-5.245
0.632754	-5.295
0.635412	-5.346
0.638071	-5.396
0.64073	-5.445
0.643388	-5.49
0.646047	-5.535
0.648705	-5.579
0.651364	-5.627
0.654023	-5.677
0.656681	-5.728
0.65934	-5.778
0.661999	-5.826
0.664657	-5.874
0.667316	-5.921
0.669974	-5.968
0.672633	-6.014
0.675292	-6.059
0.67795	-6.105
0.680609	-6.15
0.683268	-6.193
0.685926	-6.236
0.688585	-6.278
0.691244	-6.321
0.693902	-6.365
0.696561	-6.409
0.699219	-6.452
0.701878	-6.495
0.704537	-6.537
0.707195	-6.579
0.709854	-6.621
0.712513	-6.66
0.715171	-6.7
0.71783	-6.739
0.720488	-6.778
0.723147	-6.814
0.725806	-6.85
0.728464	-6.886
0.731123	-6.921
0.733782	-6.956
0.73644	-6.991
0.739099	-7.027
0.741757	-7.065
0.744416	-7.105
0.747075	-7.146
0.749733	-7.186
0.752392	-7.209
0.755051	-7.229
0.757709	-7.25
0.760368	-7.269
0.763027	-7.275
0.765685	-7.281
0.768344	-7.287
0.771002	-7.284
0.773661	-7.262
0.77632	-7.24
0.778978	-7.218
0.781637	-7.165
0.784296	-7.089
0.786954	-7.013
0.789613	-6.936
0.792271	-6.794
0.79493	-6.637
0.797589	-6.479
0.800247	-6.315
0.802906	-6.038
0.805565	-5.761
0.808223	-5.484
0.810882	-5.157
0.81354	-4.708
0.816199	-4.259
0.818858	-3.81
0.821516	-3.224
0.824175	-2.516
0.826834	-1.808
0.829492	-1.1
0.832151	-0.015
0.834809	1.185
0.837468	2.385
0.840127	3.59
0.842785	6.296
0.845444	9.002
0.848103	11.707
0.850761	15.359
0.85342	21.972
0.856079	28.585
0.858737	35.198
0.861396	43.429
0.864054	53.409
0.866713	63.389
0.869372	73.368
0.87203	82.092
0.874689	90.326
0.877348	98.56
0.880006	106.793
0.882665	112.252
0.885323	117.589
0.887982	122.927
0.890641	128.082
0.893299	132.492
0.895958	136.903
0.898617	141.313
0.901275	145.971
0.903934	150.95
0.906592	155.928
0.909251	160.907
0.91191	167.837
0.914568	175.711
0.917227	183.585
0.919886	191.458
0.922544	205.982
0.925203	221.141
0.927862	236.301
0.93052	253.756
0.933179	284.072
0.935837	314.389
0.938496	344.705
0.941155	382.002
0.943813	430.21
0.946472	478.418
0.949131	526.626
0.951789	582.865
0.954448	643.845
0.957106	704.825
0.959765	765.805
0.962424	835.488
0.965082	906.501
0.967741	977.515
0.9704	1049.2
0.973058	1126.54
0.975717	1203.87
0.978375	1281.21
0.981034	1359.81
0.983693	1440.78
0.986351	1521.76
0.98901	1602.74
0.991669	1681.6
0.994327	1758.95
0.996986	1836.31
0.999644	1913.66
1.0023	1983.27
1.00496	2051.21
1.00762	2119.14
1.01028	2186.26
1.01294	2240.78
1.0156	2295.31
1.01825	2349.83
1.02091	2400.29
1.02357	2441.26
1.02623	2482.22
1.02889	2523.19
1.03155	2558.17
1.03421	2588
1.03687	2617.84
1.03952	2647.67
1.04218	2669.01
1.04484	2687.9
1.0475	2706.79
1.05016	2725.61
1.05282	2739.72
1.05548	2753.82
1.05813	2767.93
1.06079	2780.35
1.06345	2787.81
1.06611	2795.28
1.06877	2802.74
1.07143	2809.73
1.07409	2816.23
1.07674	2822.73
1.0794	2829.22
1.08206	2834.07
1.08472	2838.31
1.08738	2842.55
1.09004	2846.79
1.0927	2849.82
1.09536	2852.8
1.09801	2855.8
1.10067	2858.8
1.10333	2861.84
1.10599	2864.89
1.10865	2867.93
1.11131	2869.42
1.11397	2868.99
1.11662	2868.56
1.11928	2868.12
1.12194	2868.69
1.1246	2869.71
1.12726	2870.74
1.12992	2871.76
1.13258	2871.17
1.13523	2870.45
1.13789	2869.72
1.14055	2868.9
1.14321	2867.55
1.14587	2866.2
1.14853	2864.85
1.15119	2863.52
1.15384	2862.2
1.1565	2860.89
1.15916	2859.58
1.16182	2856.24
1.16448	2851.77
1.16714	2847.3
1.1698	2842.83
1.17246	2839.03
1.17511	2835.33
1.17777	2831.62
1.18043	2827.8
1.18309	2823.1
1.18575	2818.41
1.18841	2813.71
1.19107	2808.76
1.19372	2803.34
1.19638	2797.92
1.19904	2792.5
1.2017	2786.12
1.20436	2779.09
1.20702	2772.07
1.20968	2765.04
1.21233	2759.32
1.21499	2753.86
1.21765	2748.41
1.22031	2742.82
1.22297	2735.62
1.22563	2728.42
1.22829	2721.22
1.23095	2714.68
1.2336	2709.58
1.23626	2704.48
1.23892	2699.39
1.24158	2694.14
1.24424	2688.78
1.2469	2683.41
1.24956	2678.04
1.25221	2673.04
1.25487	2668.13
1.25753	2663.23
1.26019	2658.38
1.26285	2655.51
1.26551	2652.64
1.26817	2649.77
1.27082	2647.7
1.27348	2647.84
1.27614	2647.99
1.2788	2648.14
1.28146	2649.83
1.28412	2653.04
1.28678	2656.25
1.28944	2659.46
1.29209	2665.24
1.29475	2671.91
1.29741	2678.59
1.30007	2685.26
1.30273	2690.61
1.30539	2695.93
1.30805	2701.26
1.3107	2706.84
1.31336	2713.3
1.31602	2719.76
1.31868	2726.22
1.32134	2732.48
1.324	2738.49
1.32666	2744.51
1.32931	2750.53
1.33197	2754.59
1.33463	2757.81
1.33729	2761.03
1.33995	2764.24
1.34261	2764.7
1.34527	2764.97
1.34792	2765.24
1.35058	2765.29
1.35324	2764.29
1.3559	2763.28
1.35856	2762.28
1.36122	2760.38
1.36388	2757.21
1.36654	2754.04
1.36919	2750.88
1.37185	2745.69
1.37451	2739.42
1.37717	2733.16
1.37983	2726.9
1.38249	2720.64
1.38515	2714.39
1.3878	2708.14
1.39046	2701.25
1.39312	2690.02
1.39578	2678.8
1.39844	2667.57
1.4011	2656.42
1.40376	2645.39
1.40641	2634.37
1.40907	2623.35
1.41173	2611.22
1.41439	2598.37
1.41705	2585.52
1.41971	2572.68
1.42237	2556.89
1.42503	2540.57
1.42768	2524.25
1.43034	2507.9
1.433	2491.23
1.43566	2474.56
1.43832	2457.9
1.44098	2440.35
1.44364	2420.95
1.44629	2401.55
1.44895	2382.14
1.45161	2361.75
1.45427	2340.59
1.45693	2319.42
1.45959	2298.26
1.46225	2275.47
1.4649	2252.28
1.46756	2229.09
1.47022	2205.88
1.47288	2182.25
1.47554	2158.62
1.4782	2134.99
1.48086	2110.96
1.48351	2085.89
1.48617	2060.82
1.48883	2035.75
1.49149	2010.57
1.49415	1985.28
1.49681	1960
1.49947	1934.71
1.50213	1909.33
1.50478	1883.91
1.50744	1858.5
1.5101	1833.08
1.51276	1807.02
1.51542	1780.95
1.51808	1754.89
1.52074	1728.76
1.52339	1702.44
1.52605	1676.12
1.52871	1649.8
1.53137	1623.58
1.53403	1597.47
1.53669	1571.37
1.53935	1545.26
1.542	1519.8
1.54466	1494.6
1.54732	1469.41
1.54998	1444.21
1.55264	1419.39
1.5553	1394.58
1.55796	1369.77
1.56062	1345.17
1.56327	1321.49
1.56593	1297.8
1.56859	1274.11
1.57125	1250.84
1.57391	1228.12
1.57657	1205.4
1.57923	1182.68
1.58188	1160.21
1.58454	1137.86
1.5872	1115.52
1.58986	1093.17
1.59252	1071.22
1.59518	1049.3
1.59784	1027.38
1.60049	1005.52
1.60315	983.98
1.60581	962.438
1.60847	940.895
1.61113	919.937
1.61379	899.931
1.61645	879.925
1.61911	859.92
1.62176	840.666
1.62442	821.875
1.62708	803.084
1.62974	784.293
1.6324	766.927
1.63506	749.796
1.63772	732.666
1.64037	715.685
1.64303	700.1
1.64569	684.515
1.64835	668.93
1.65101	653.672
1.65367	639.06
1.65633	624.448
1.65898	609.837
1.66164	595.757
1.6643	582.071
1.66696	568.386
1.66962	554.7
1.67228	541.618
1.67494	528.675
1.67759	515.732
1.68025	502.856
1.68291	491.222
1.68557	479.588
1.68823	467.954
1.69089	456.587
1.69355	445.873
1.69621	435.159
1.69886	424.445
1.70152	414.321
1.70418	404.724
1.70684	395.127
1.7095	385.531
1.71216	376.636
1.71482	367.954
1.71747	359.272
1.72013	350.593
1.72279	342.477
1.72545	334.361
1.72811	326.245
1.73077	318.219
1.73343	310.474
1.73608	302.729
1.73874	294.983
1.7414	287.334
1.74406	279.786
1.74672	272.239
1.74938	264.692
1.75204	257.32
1.7547	250.015
1.75735	242.711
1.76001	235.407
1.76267	228.261
1.76533	221.121
1.76799	213.981
1.77065	206.936
1.77331	200.27
1.77596	193.605
1.77862	186.939
1.78128	180.574
1.78394	174.595
1.7866	168.616
1.78926	162.637
1.79192	157.23
1.79457	152.096
1.79723	146.963
1.79989	141.829
1.80255	137.551
1.80521	133.353
1.80787	129.155
1.81053	125.098
1.81318	121.822
1.81584	118.546
1.8185	115.27
1.82116	112.322
1.82382	109.882
1.82648	107.441
1.82914	105
1.8318	102.905
1.83445	101.011
1.83711	99.117
1.83977	97.224
1.84243	95.733
1.84509	94.303
1.84775	92.873
1.85041	91.486
1.85306	90.457
1.85572	89.427
1.85838	88.397
1.86104	87.501
1.8637	86.857
1.86636	86.212
1.86902	85.567
1.87167	85.1
1.87433	84.759
1.87699	84.417
1.87965	84.076
1.88231	83.96
1.88497	83.892
1.88763	83.825
1.89029	83.781
1.89294	84.09
1.8956	84.399
1.89826	84.709
1.90092	85.145
1.90358	85.875
1.90624	86.605
1.9089	87.335
1.91155	88.365
1.91421	89.65
1.91687	90.936
1.91953	92.221
1.92219	94.032
1.92485	95.992
1.92751	97.953
1.93016	99.932
1.93282	102.975
1.93548	106.018
1.93814	109.061
1.9408	112.544
1.94346	117.303
1.94612	122.063
1.94878	126.822
1.95143	132.676
1.95409	139.647
1.95675	146.618
1.95941	153.589
1.96207	162.565
1.96473	172.269
1.96739	181.972
1.97004	191.676
1.9727	204.822
1.97536	218.067
1.97802	231.311
1.98068	245.459
1.98334	262.983
1.986	280.508
1.98865	298.032
1.99131	317.817
1.99397	340.366
1.99663	362.916
1.99929	385.465
2.00195	412.319
2.00461	441.123
2.00726	469.926
2.00992	498.729
2.01258	537.676
2.01524	577.42
2.0179	617.165
2.02056	659.439
2.02322	714.448
2.02588	769.457
2.02853	824.466
2.03119	885.258
2.03385	954.568
2.03651	1023.88
2.03917	1093.19
2.04183	1164.91
2.04449	1237.96
2.04714	1311.02
2.0498	1384.08
2.05246	1447.01
2.05512	1508.58
2.05778	1570.15
2.06044	1629.57
2.0631	1673.24
2.06575	1716.91
2.06841	1760.58
2.07107	1800.46
2.07373	1833.57
2.07639	1866.68
2.07905	1899.8
2.08171	1932.22
2.08437	1964.18
2.08702	1996.15
2.08968	2028.11
2.09234	2057.12
2.095	2085.55
2.09766	2113.98
2.10032	2141.73
2.10298	2161.18
2.10563	2180.62
2.10829	2200.07
2.11095	2216.27
2.11361	2225.37
2.11627	2234.47
2.11893	2243.56
2.12159	2248.78
2.12424	2250.86
2.1269	2252.94
2.12956	2255.01
2.13222	2252.68
2.13488	2249.18
2.13754	2245.67
2.1402	2242.05
2.14285	2234.55
2.14551	2227.04
2.14817	2219.53
2.15083	2210.97
2.15349	2199.57
2.15615	2188.17
2.15881	2176.76
2.16147	2164
2.16412	2149.91
2.16678	2135.82
2.16944	2121.73
2.1721	2106.28
2.17476	2090.35
2.17742	2074.43
2.18008	2058.51
2.18273	2042.08
2.18539	2025.64
2.18805	2009.2
2.19071	1992.49
2.19337	1974.88
2.19603	1957.27
2.19869	1939.65
2.20134	1921.33
2.204	1902.19
2.20666	1883.05
2.20932	1863.91
2.21198	1843.47
2.21464	1822.49
2.2173	1801.5
2.21996	1780.51
2.22261	1758.28
2.22527	1735.96
2.22793	1713.64
2.23059	1690.98
2.23325	1666.69
2.23591	1642.4
2.23857	1618.12
2.24122	1593.1
2.24388	1567.05
2.24654	1541
2.2492	1514.95
2.25186	1488.11
2.25452	1460.85
2.25718	1433.59
2.25983	1406.32
2.26249	1378.15
2.26515	1349.87
2.26781	1321.59
2.27047	1293.29
2.27313	1264.82
2.27579	1236.36
2.27845	1207.9
2.2811	1179.89
2.28376	1152.62
2.28642	1125.36
2.28908	1098.1
2.29174	1071.01
2.2944	1044.03
2.29706	1017.05
2.29971	990.064
2.30237	964.267
2.30503	938.681
2.30769	913.096
2.31035	887.591
2.31301	862.935
2.31567	838.279
2.31832	813.623
2.32098	789.36
2.32364	765.912
2.3263	742.464
2.32896	719.016
2.33162	695.925
2.33428	673.109
2.33693	650.294
2.33959	627.479
2.34225	605.307
2.34491	583.294
2.34757	561.281
2.35023	539.301
2.35289	518.087
2.35555	496.873
2.3582	475.658
2.36086	454.545
2.36352	433.691
2.36618	412.838
2.36884	391.984
2.3715	371.793
2.37416	352.215
2.37681	332.638
2.37947	313.061
2.38213	294.739
2.38479	276.819
2.38745	258.898
2.39011	240.978
2.39277	225.876
2.39542	210.785
2.39808	195.694
