# Supplementary material for: Structural basis of RNA processing by human mitochondrial RNase P
Source: Nat Struct Mol Biol. 2021 Sep 6;28(9):713–23. doi: 10.1038/s41594-021-00637-y (PMC8437803; doi:10.1038/s41594-021-00637-y)

Source Data Extended Data Figure 1

Source data for Extended Data Figure 1a  
Dashed rectangle represents the area shown in Extended Data Figure 1a.

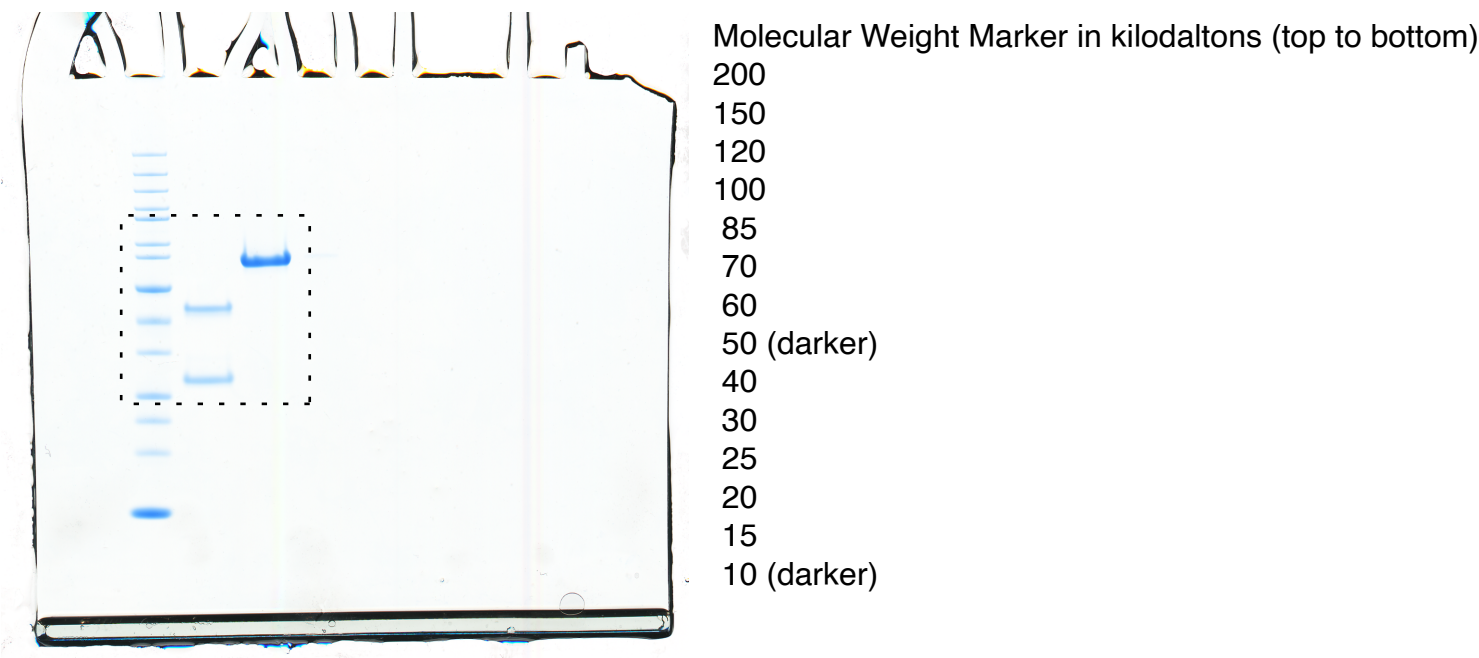

Source data for Extended Data Figure 1b  
RNA Size Marker in polynucleotide length (top to bottom)  
1000, 800, 600, 400, 300, 200 (faint), 100

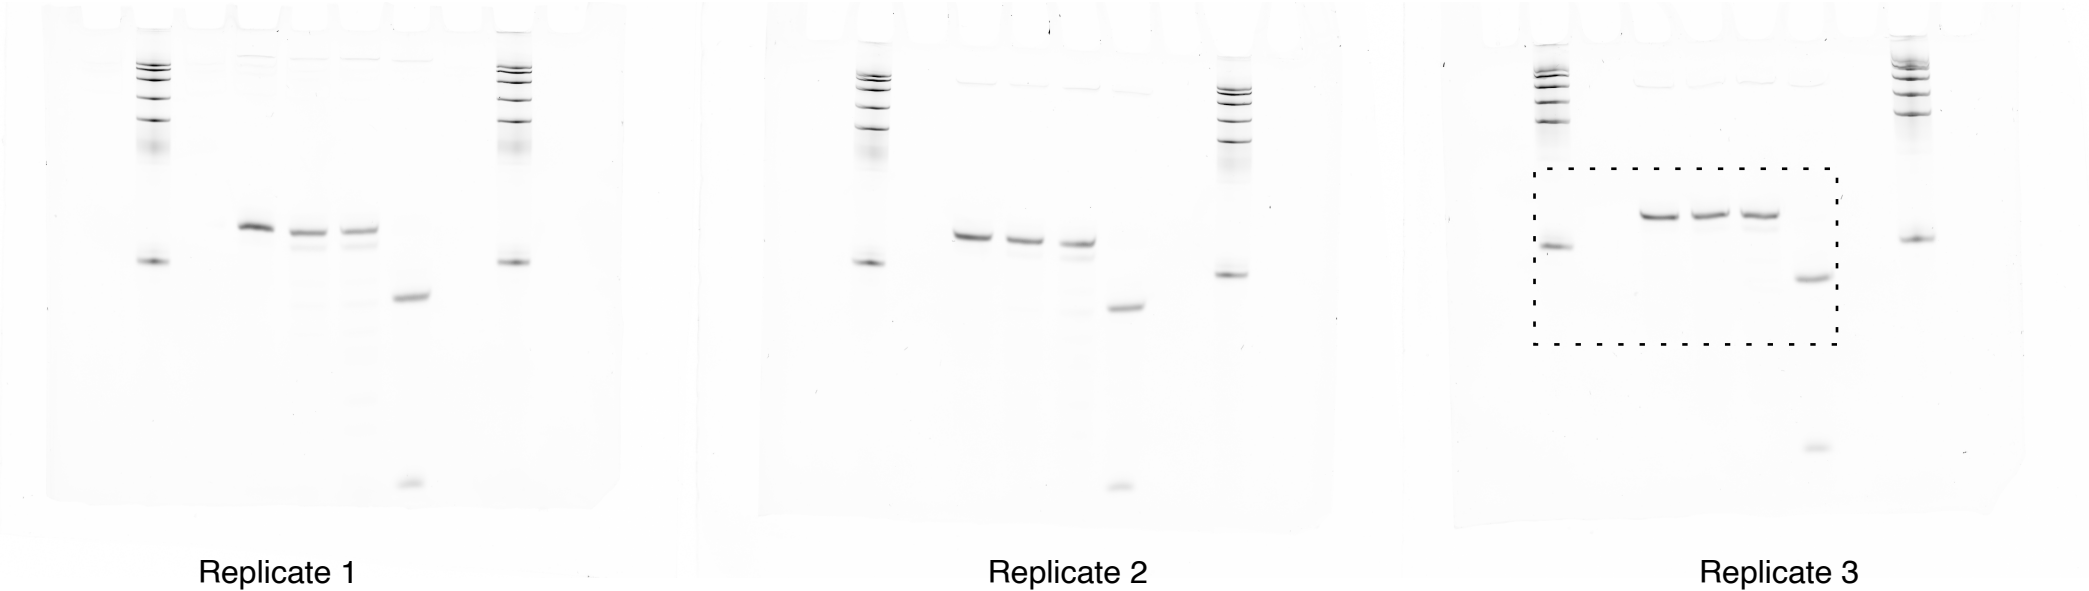

Dashed rectangle represents  
the area shown in Extended Data Figure 1b.

Source Data for Extended Data Figure 1c

RNA Size Marker in polynucleotide length (top to bottom)  
1000, 800, 600, 400, 300, 200 (faint), 100

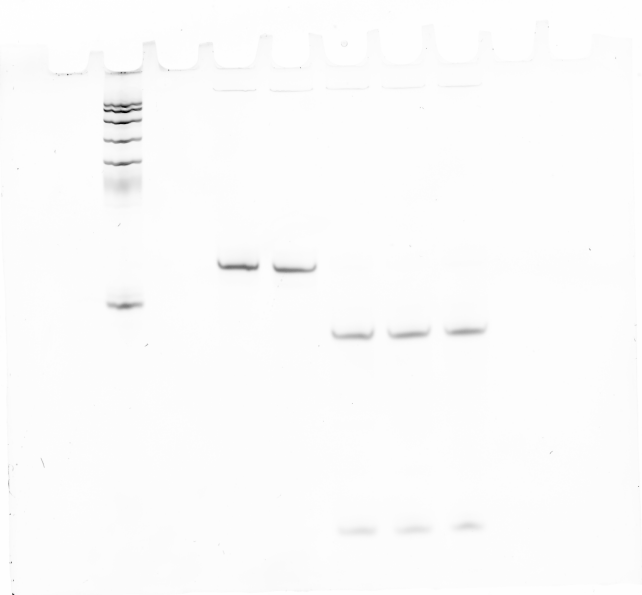

Replicate 1

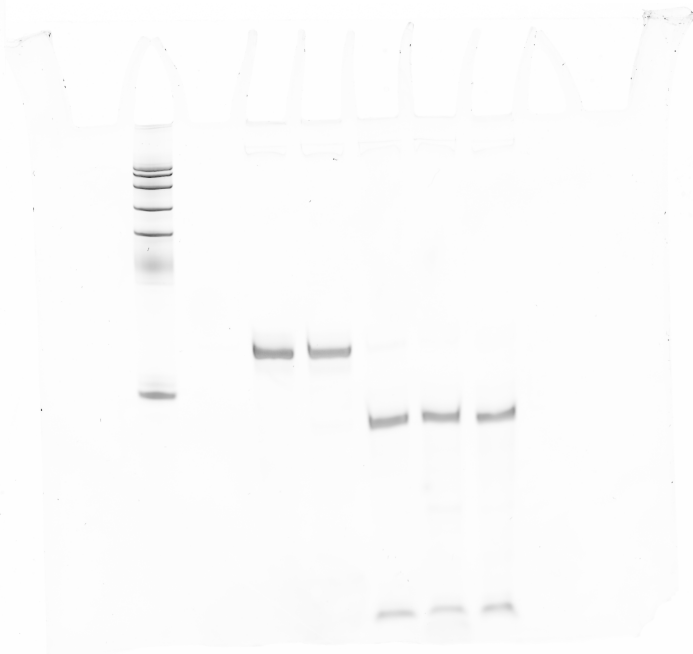

Replicate 2

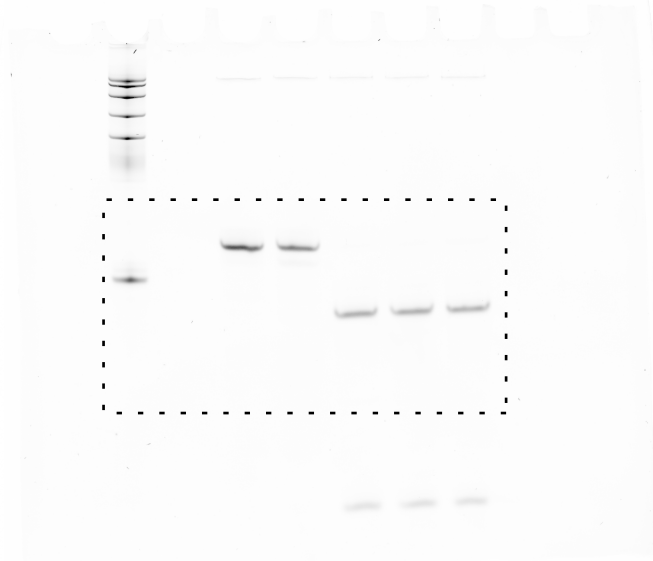

Replicate 3

Dashed rectangle represents the area shown in Extended Data Figure 1c.

Source Data for Extended Data Figure 1d

Dashed rectangles represent the areas shown in Extended Data Figure 1d for protein (left) and RNA (right) gels.

Molecular Weight Marker  
in kilodaltons (top to bottom)  
140  
110  
80  
70 (darker)  
50  
40  
30  
25  
15

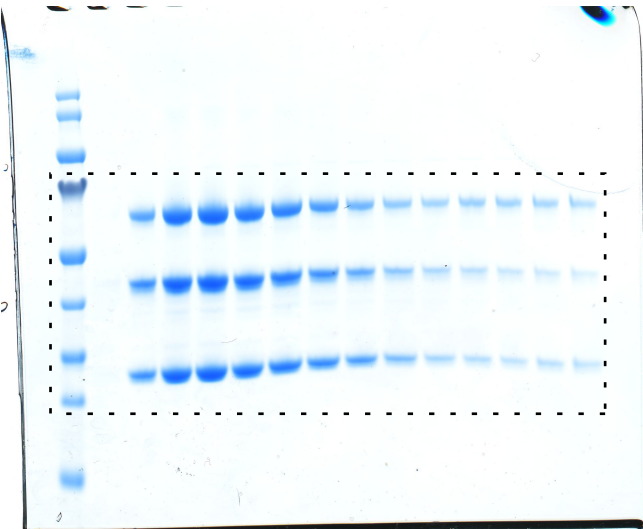

RNA Size Marker  
in polynucleotide length  
(top to bottom)  
1000  
800  
600  
400  
300  
200 (faint)  
100

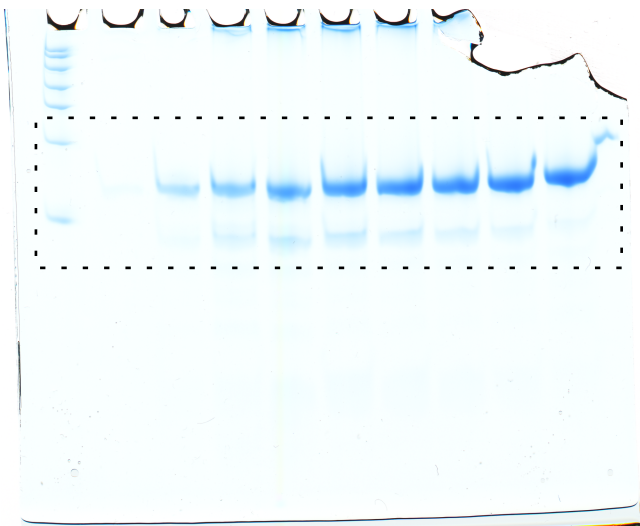

Supplement: Source Data Extended Data Fig. 1 — Unprocessed images for gels shown in Extended Data Fig. 1 and gel images for replicates for panels b and c. [file 41594_2021_637_MOESM5_ESM.pdf]
